# Supplementary material for: High performance flexible double-sided micro-supercapacitors with an organic gel electrolyte containing a redox-active additive
Source: Royal Society of Chemistry journal article supplement (doi:10.1039/c6nr04352f), 2016-01-01
Supplement: c6nr04352f1.pdf [file c6nr04352f1.pdf]

# **High performance flexible double-sided micro-supercapacitors with an organic gel electrolyte containing a redox-active additive**

Doyeon Kim,<sup>a</sup> Geumbee Lee,<sup>a</sup> Daeil Kim,<sup>b</sup> Junyeong Yun,<sup>b</sup> Sang-Soo Lee<sup>a,c</sup> and Jeong Sook Ha<sup>a,b,\*</sup>

<sup>a</sup>KU-KIST Graduate School of Converging Science and Technology, Korea University, 145 Anam-ro, Seongbuk-gu, Seoul, 02841, Republic of Korea

<sup>b</sup>Department of Chemical and Biological Engineering, Korea University, 145 Anam-ro, Seongbuk-gu, Seoul, 02841, Republic of Korea

<sup>c</sup>Photo-Electronic Hybrids Research Center, Korea Institute of Science and Technology, Seoul, 136-791, Republic of Korea

\*Address correspondence to Jeong Sook Ha, jeongsha@korea.ac.kr.

## Supplementary Information

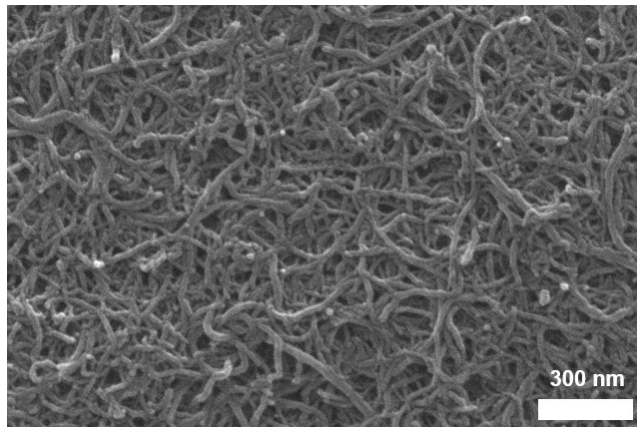

**Figure S1.** SEM image of a spray-coated functionalized MWNT film (top view).

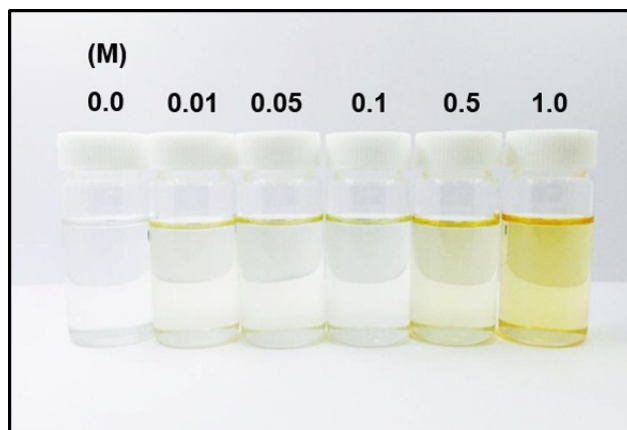

**Figure S2.** Image of PMMA-PC-LiClO<sub>4</sub>-HQ solutions containing various concentrations of HQ.

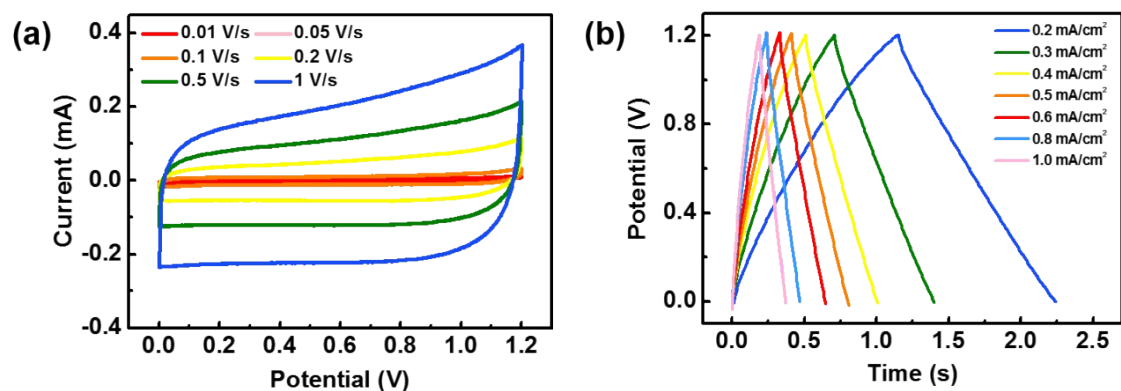

**Figure S3.** Electrochemical performance of a single MSC containing PMMA-PC-LiClO<sub>4</sub>. (a) CV curves obtained at scan rates from 0.01 to 1.0 V s<sup>-1</sup>. (b) GCD curves measured at current densities from 0.2 to 1.0 mA cm<sup>-2</sup>.

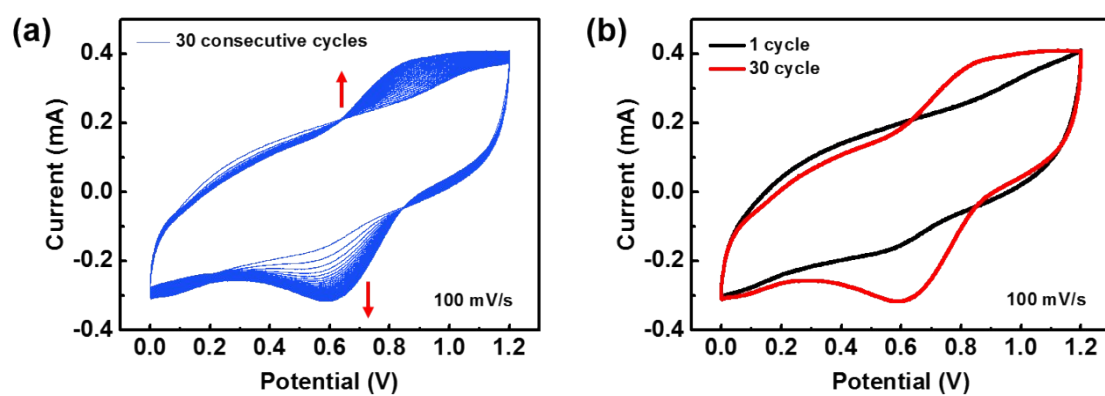

**Figure S4.** Change of CV curves with repetition cycles up-to 30 times (left) and the comparison of the CV curves between the initial and 30<sup>th</sup> cycles (right).

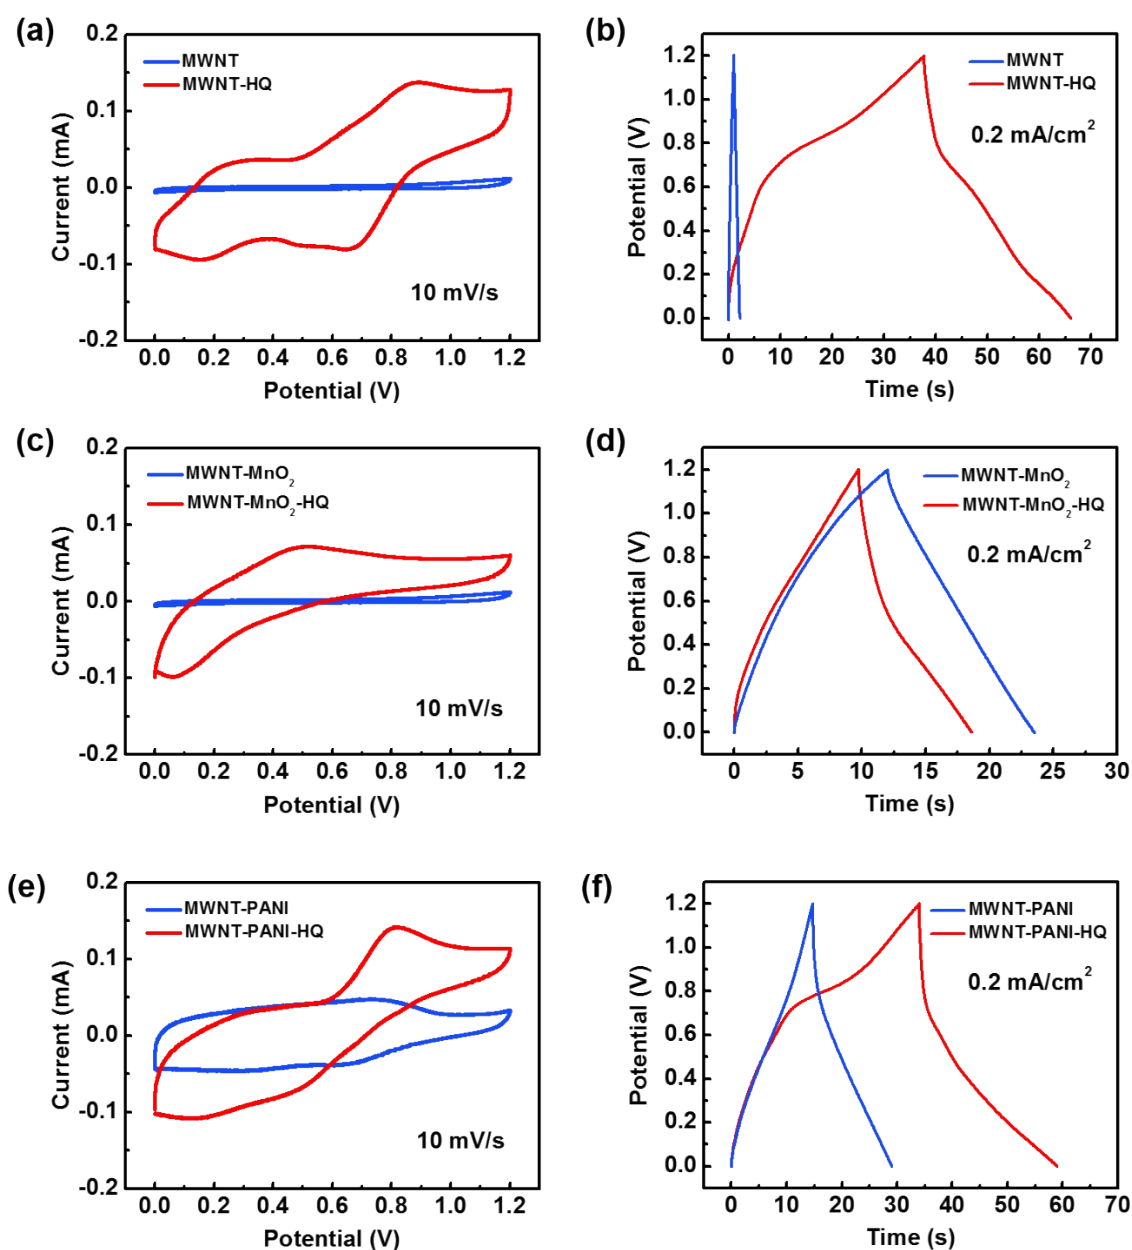

**Figure S5.** Effect of HQ with different electrode materials. (a, b) CV and GCD curves of MWNT electrodes. (c, d) CV and GCD curves of MWNT-MnO<sub>2</sub> electrodes. (e, f) CV and GCD curves of MWNT-PANI electrodes.

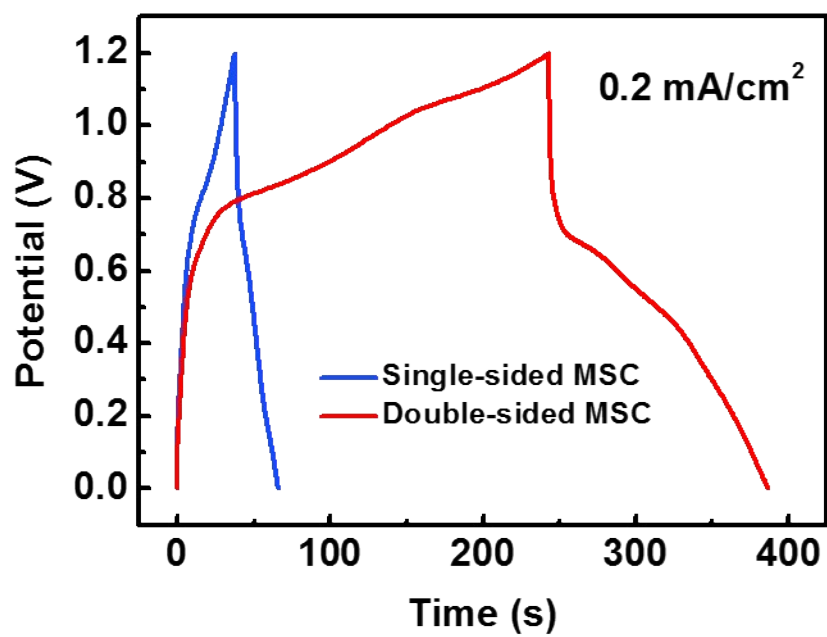

**Figure S6.** Galvanostatic charge-discharge curve of double-sided MSC based on PMMA-PC-LiClO<sub>4</sub>-HQ at low current density of 0.2 mA cm<sup>-2</sup>.

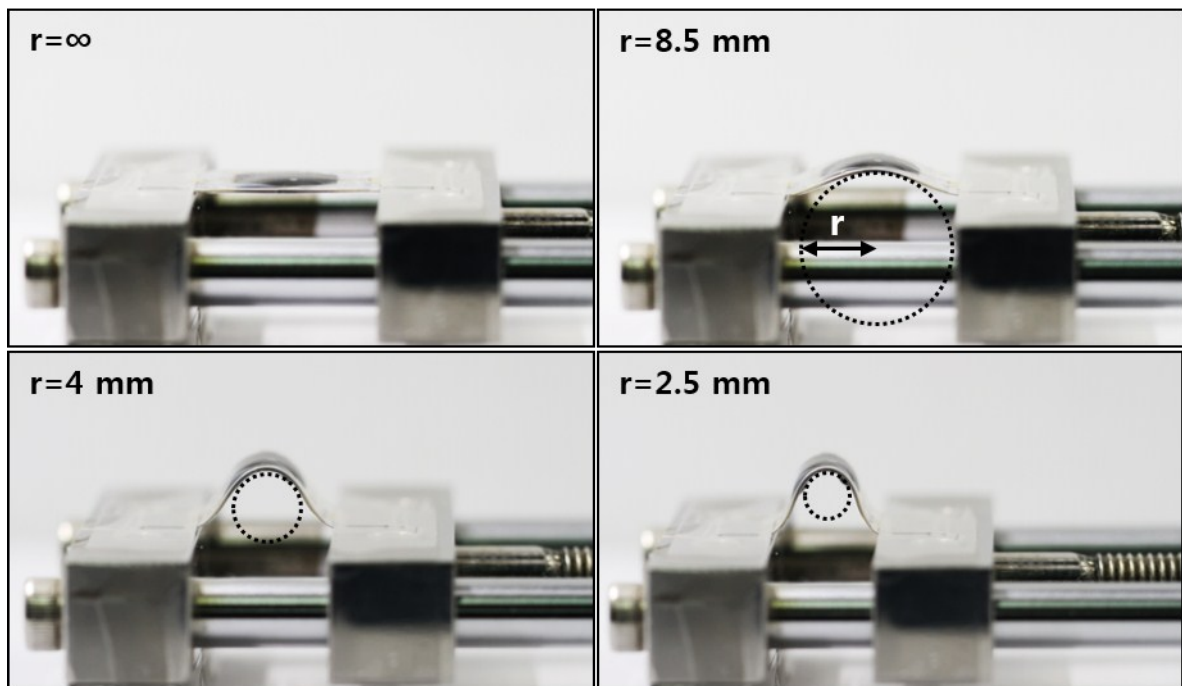

**Figure S7.** Photographs of the encapsulated double-sided MSC at various bending radii.
